# Supplementary material
Source: PubMed Central journal article supplement (PMC9614684)

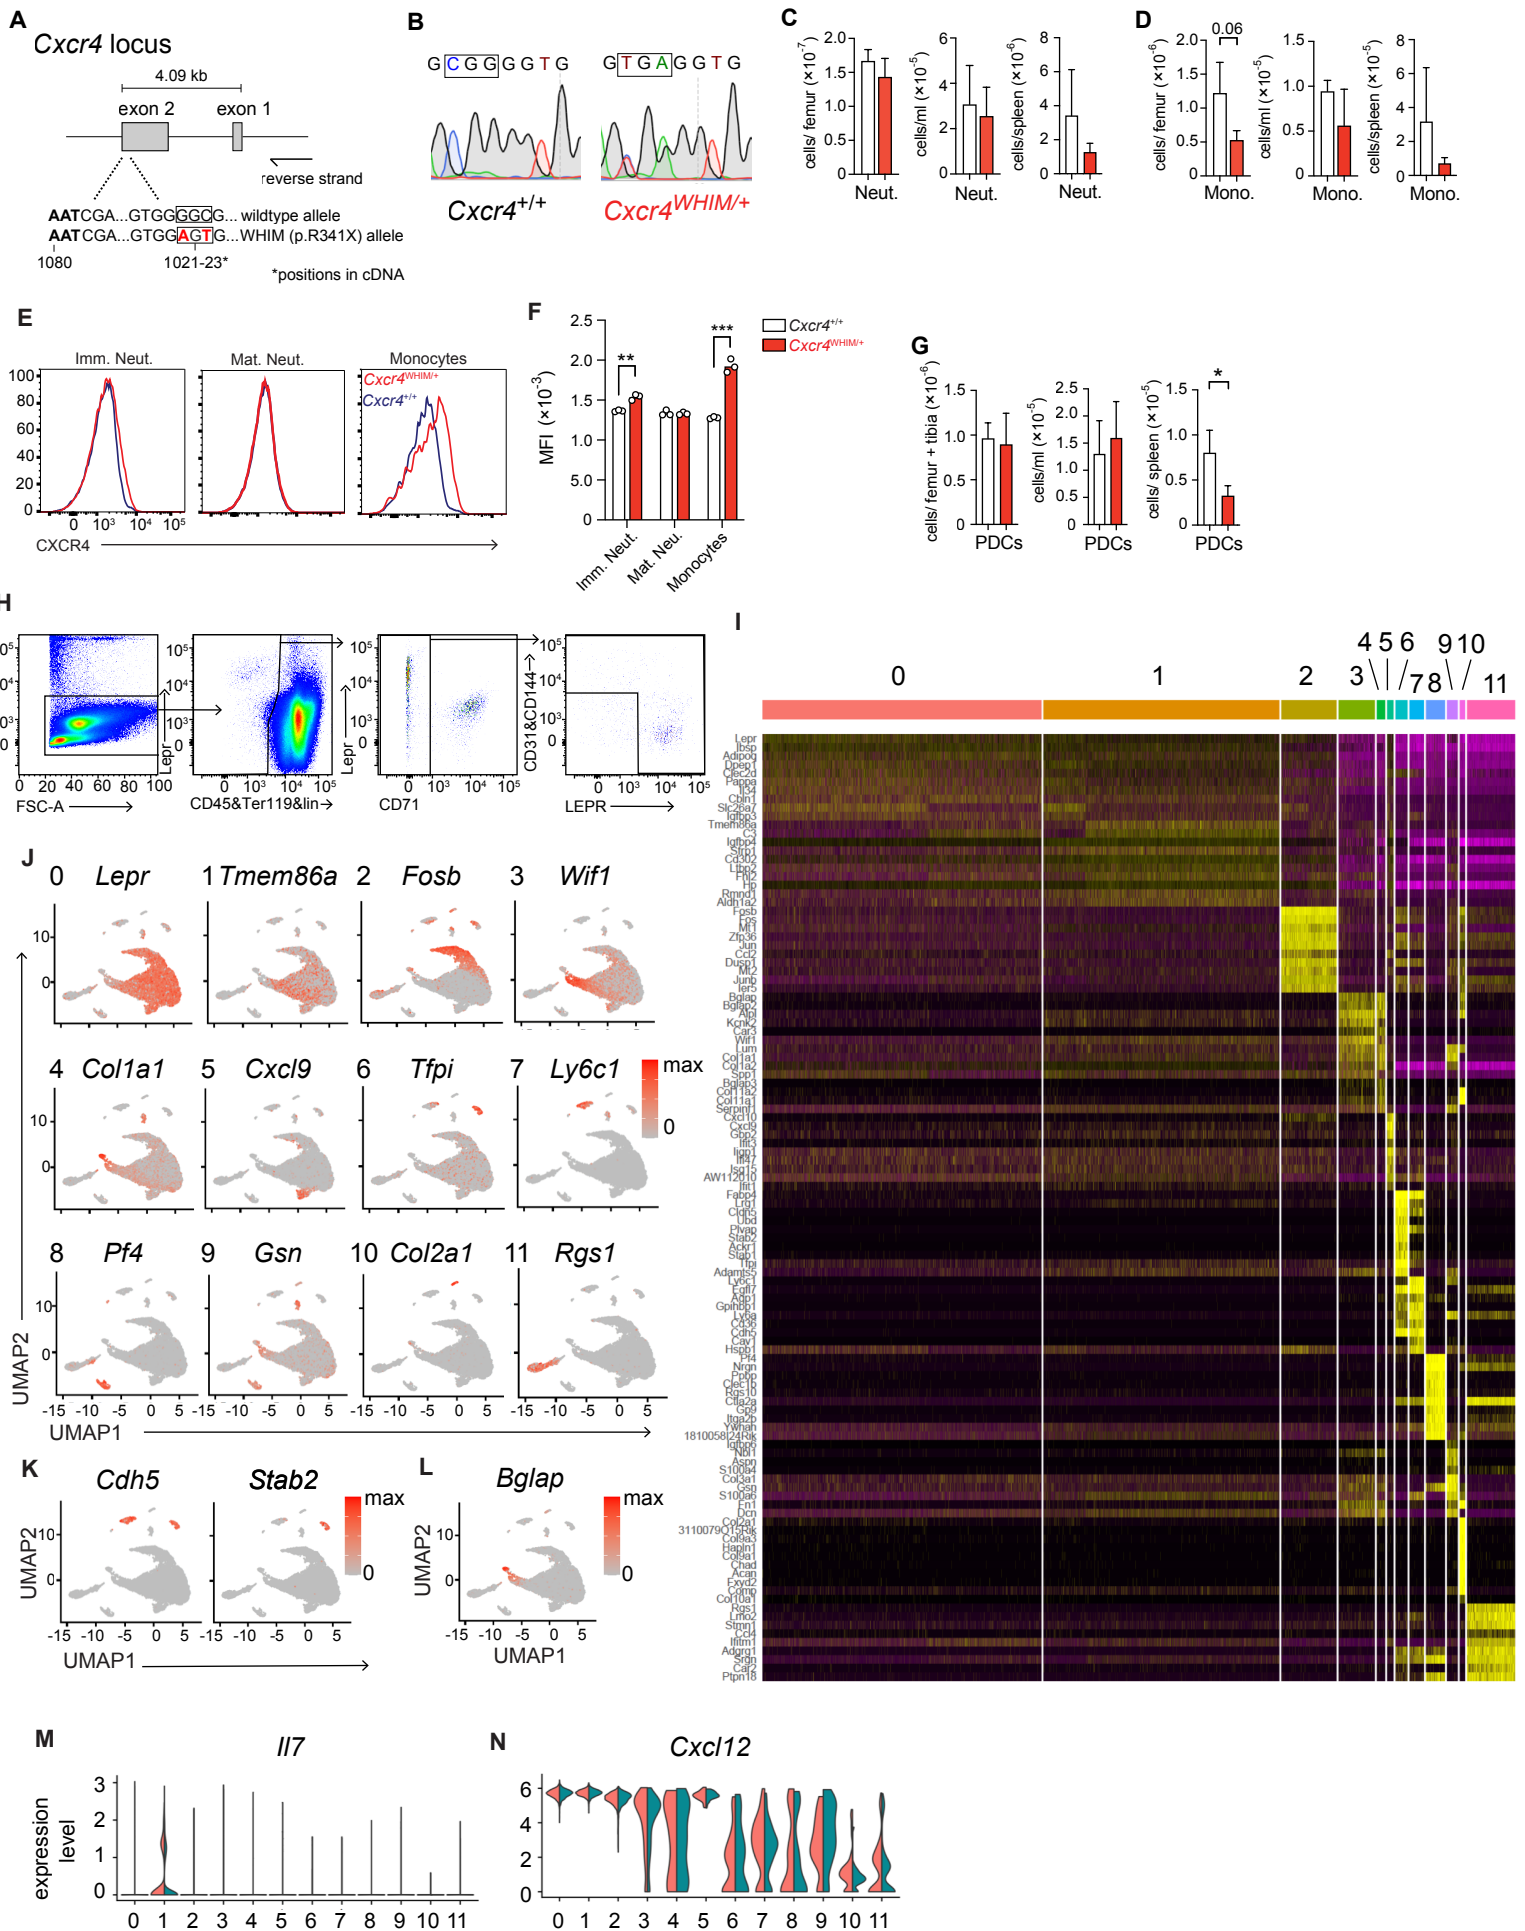

Supplement: NIHMS1838718-supplement-Sup__Fig__1.pdf [file NIHMS1838718-supplement-Sup__Fig__1.pdf]

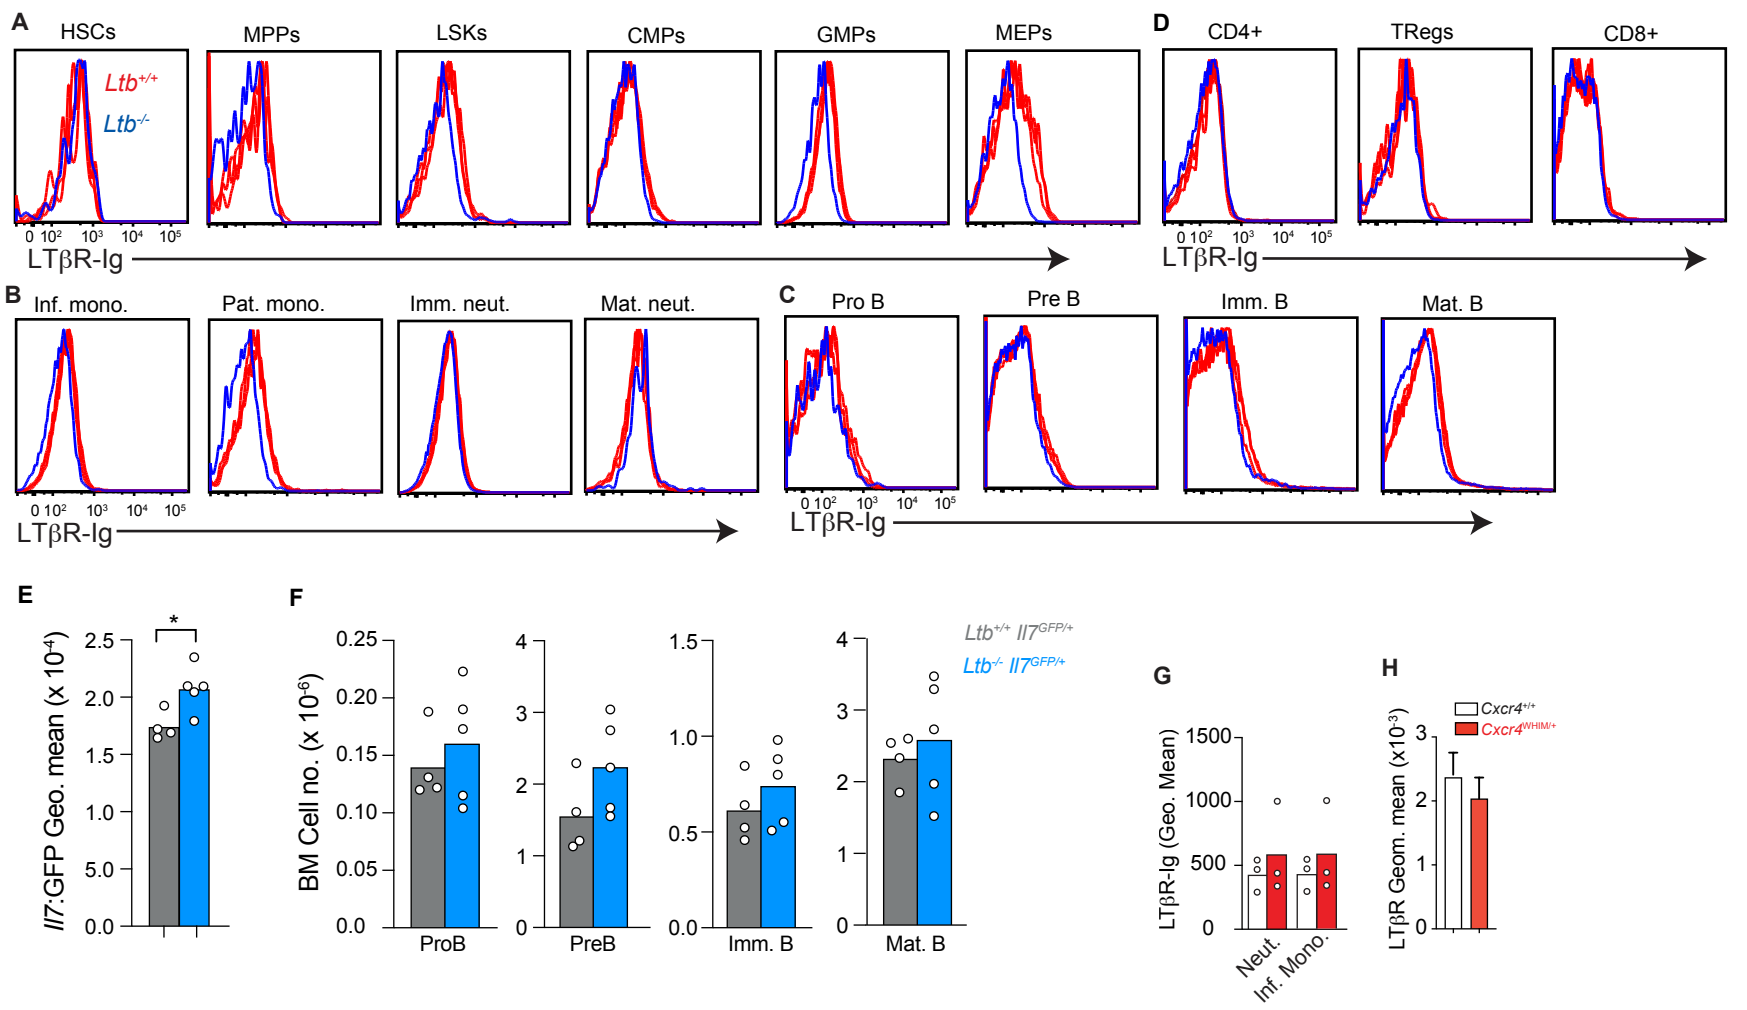

Supplement: NIHMS1838718-supplement-Sup__Fig__2.pdf [file NIHMS1838718-supplement-Sup__Fig__2.pdf]

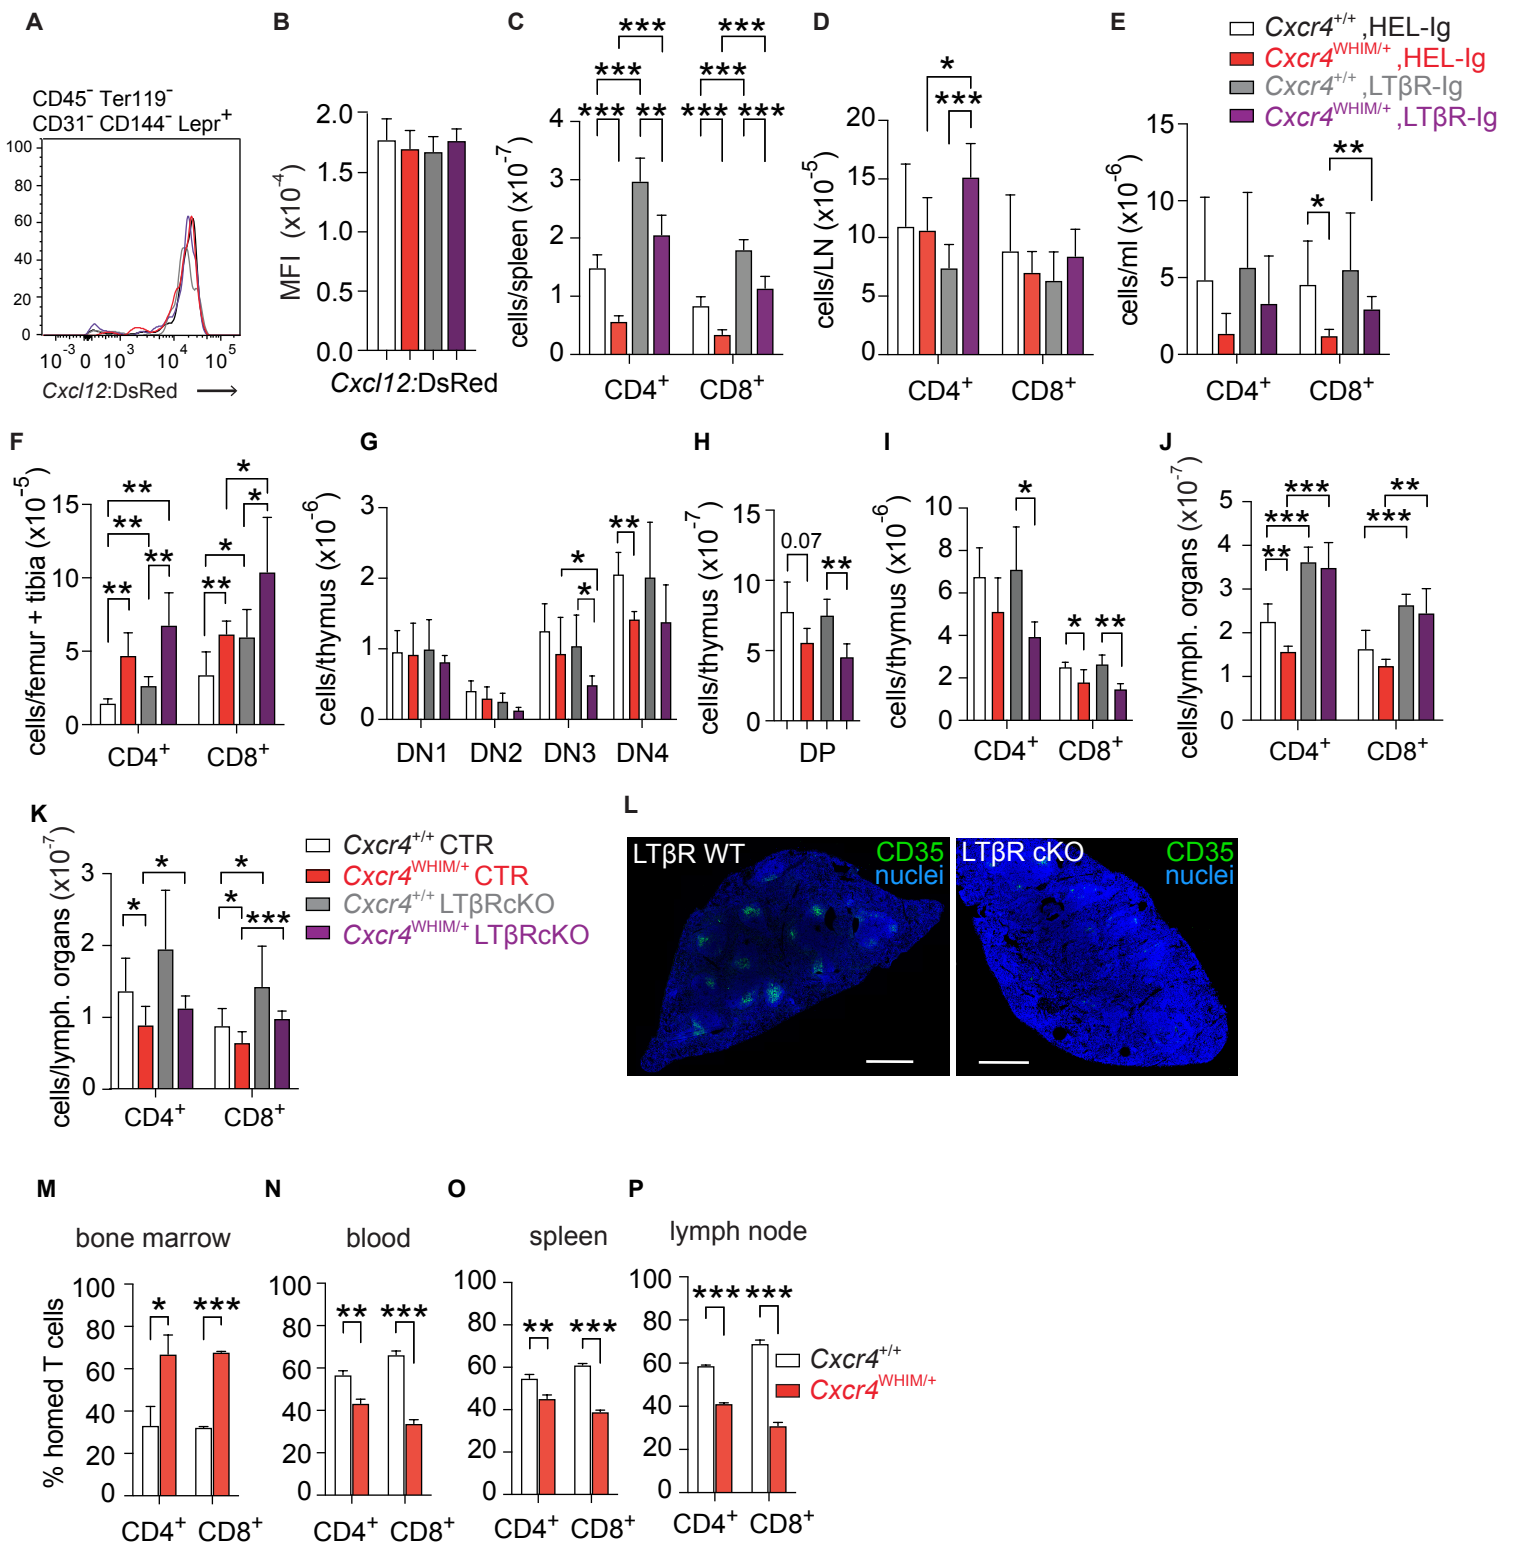

Supplement: NIHMS1838718-supplement-Sup__Fig__3.pdf [file NIHMS1838718-supplement-Sup__Fig__3.pdf]

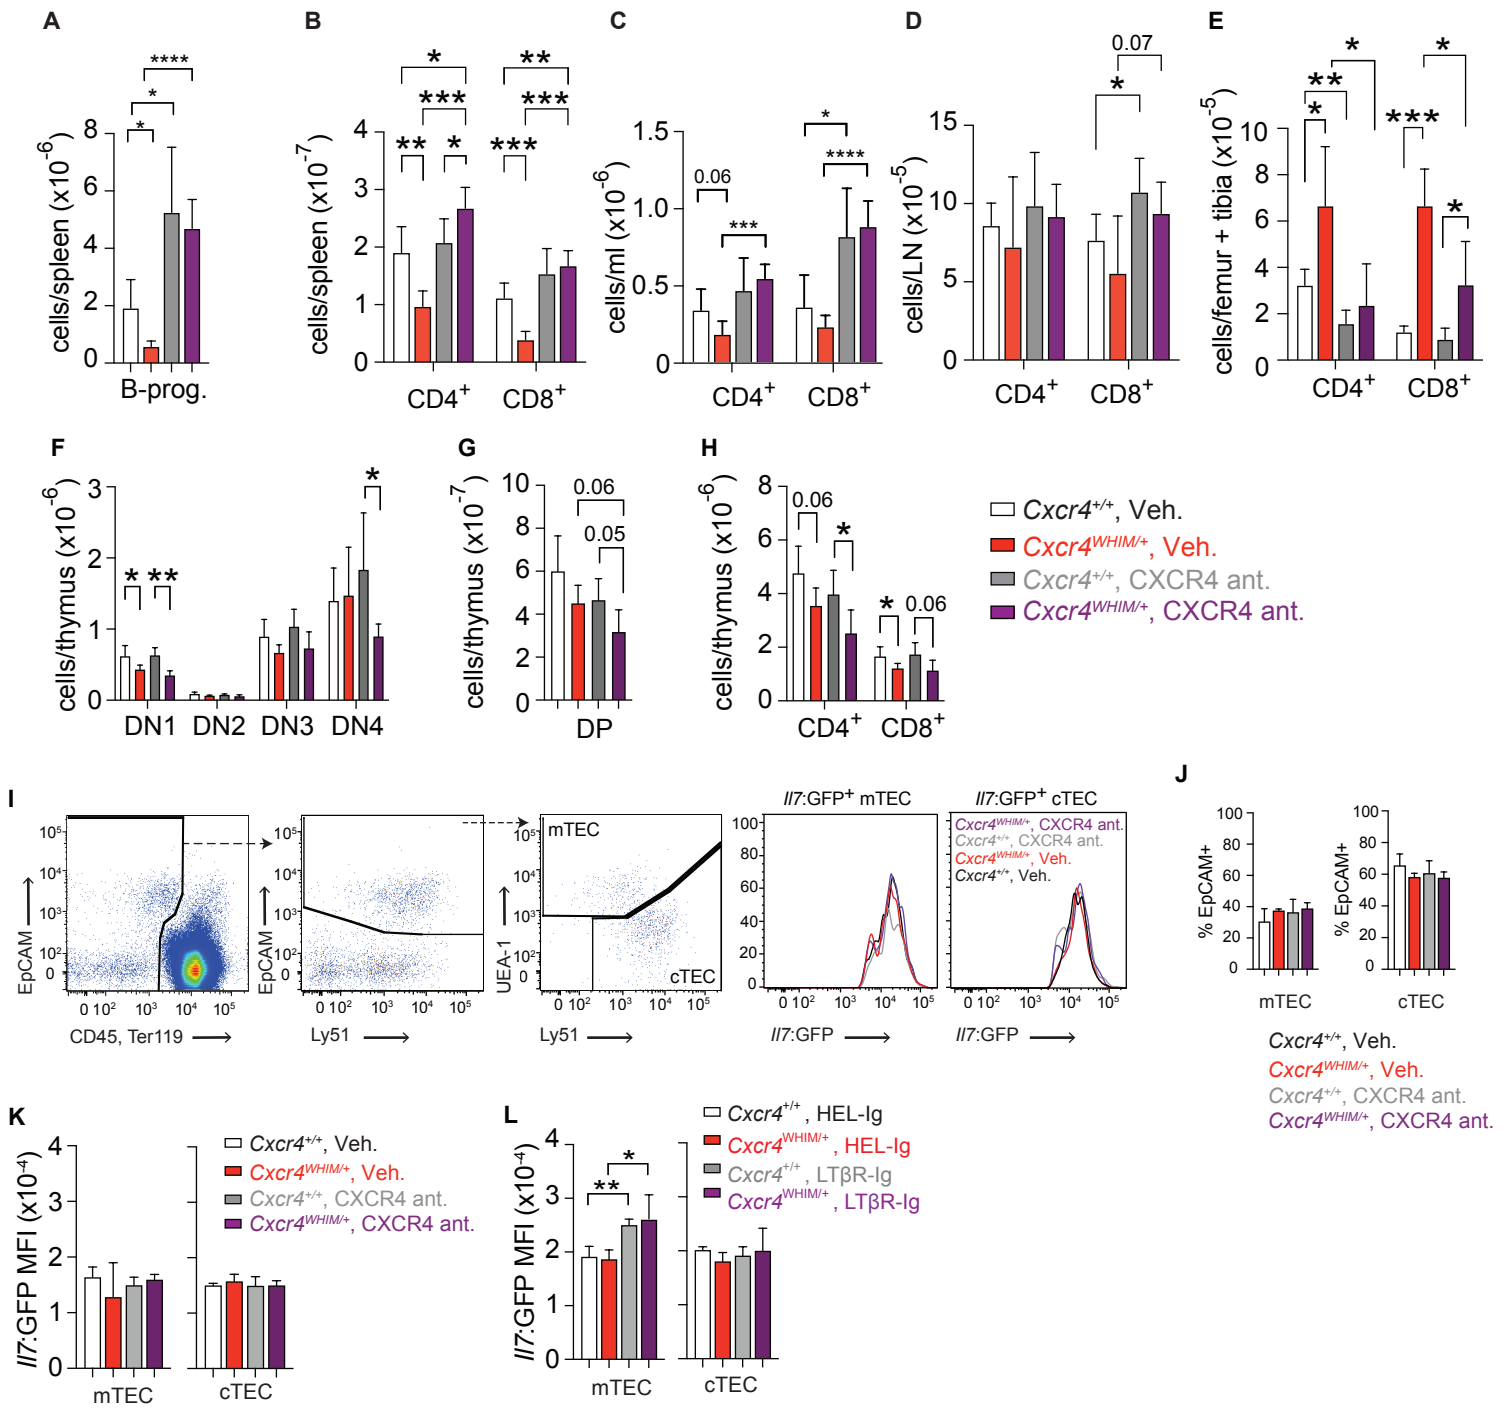

Supplement: NIHMS1838718-supplement-Sup__Fig__4.pdf [file NIHMS1838718-supplement-Sup__Fig__4.pdf]

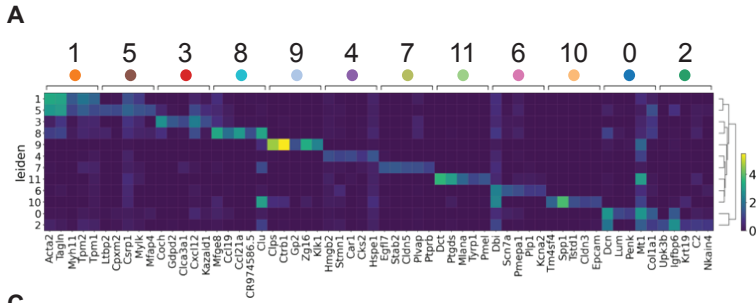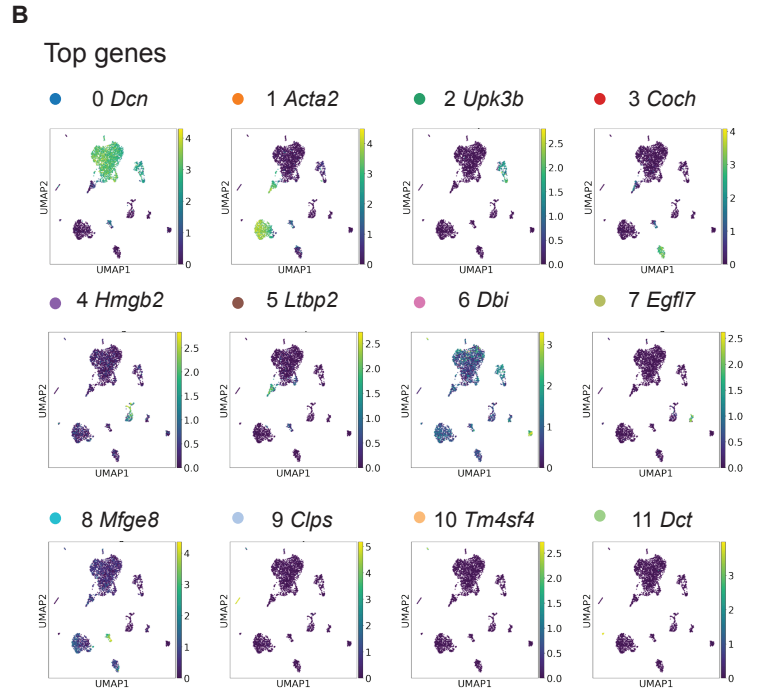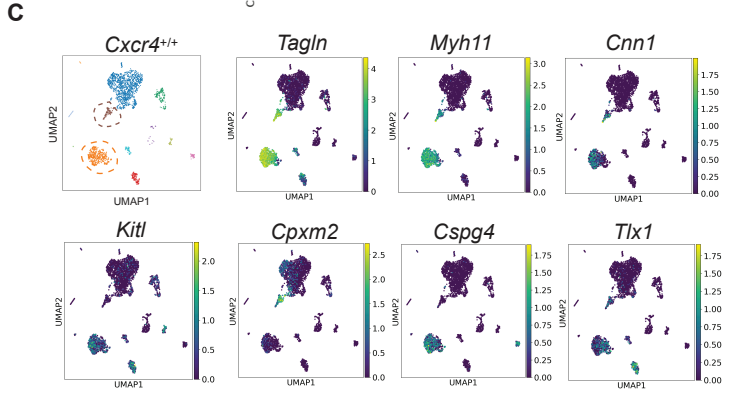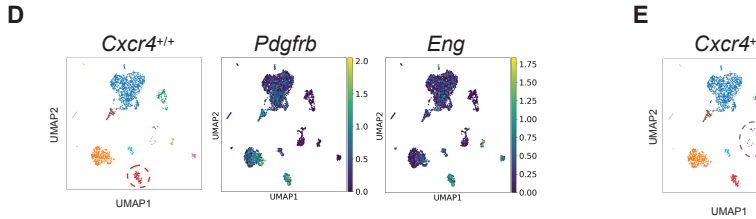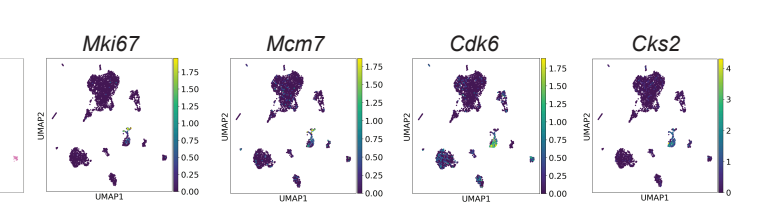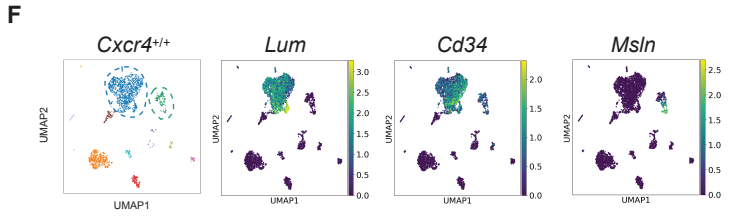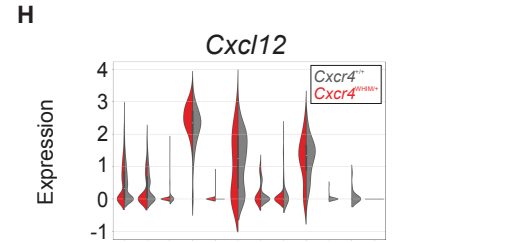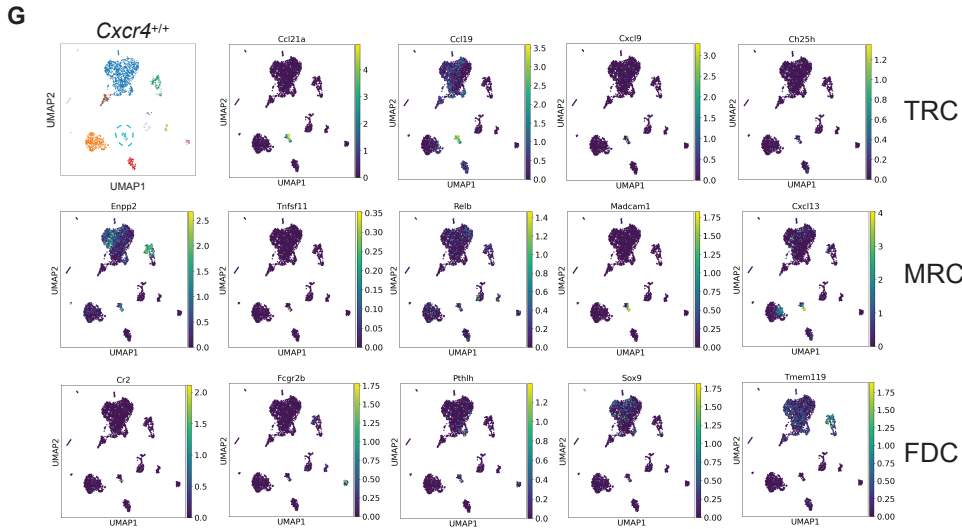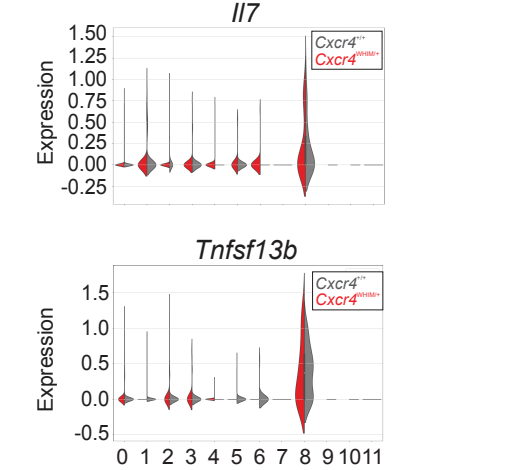

Supplement: NIHMS1838718-supplement-Sup__Fig__5.pdf [file NIHMS1838718-supplement-Sup__Fig__5.pdf]

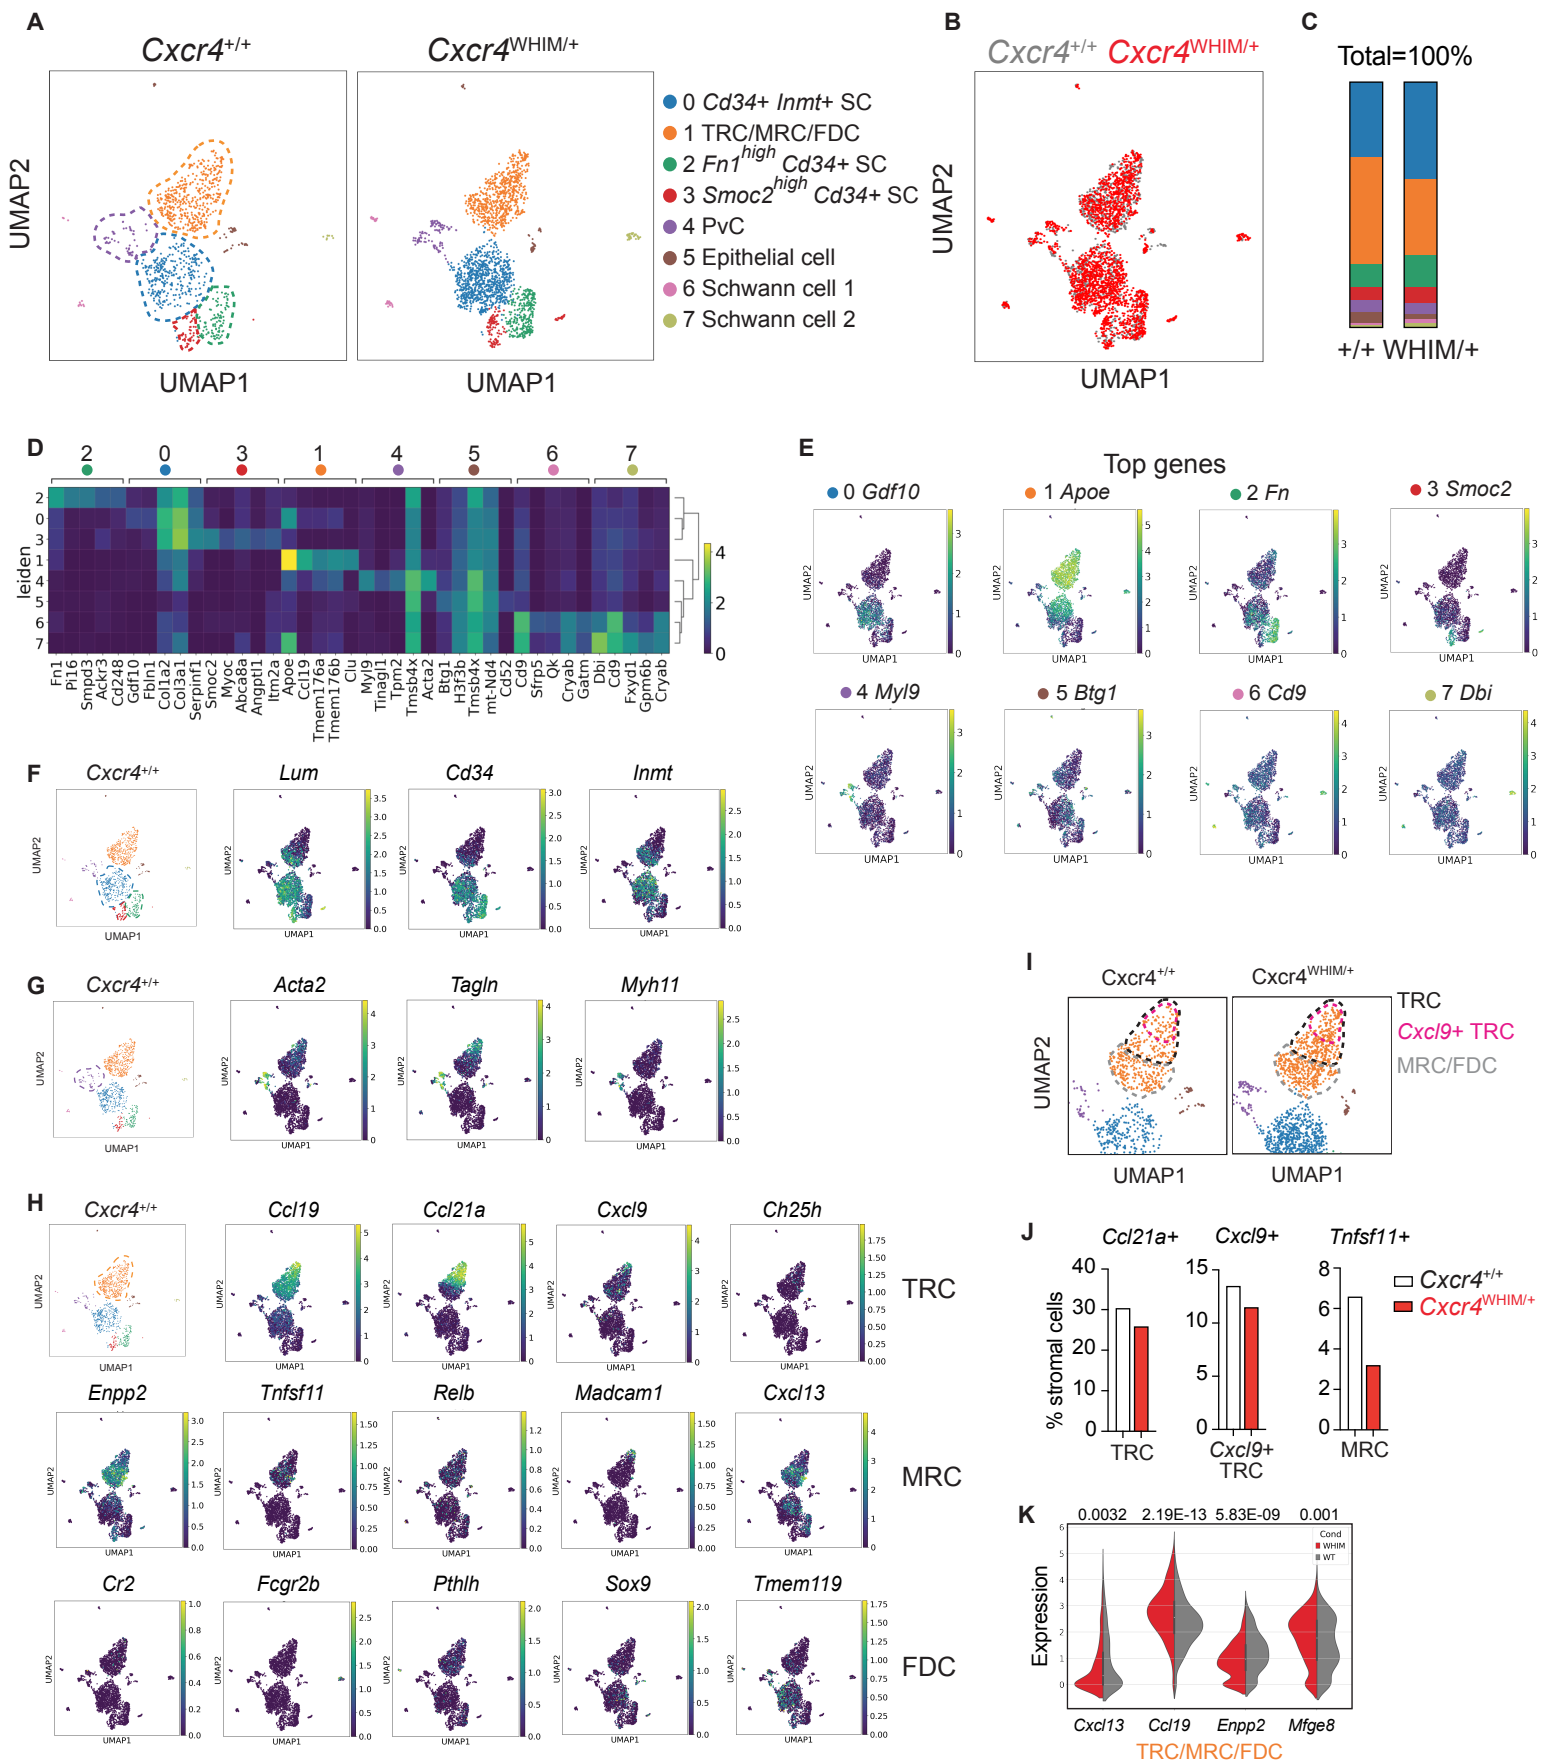

Supplement: NIHMS1838718-supplement-Sup__Fig__6.pdf [file NIHMS1838718-supplement-Sup__Fig__6.pdf]

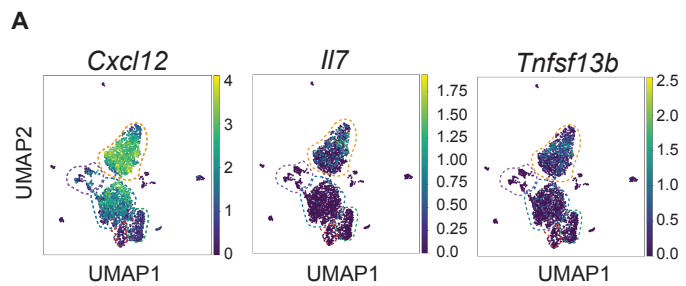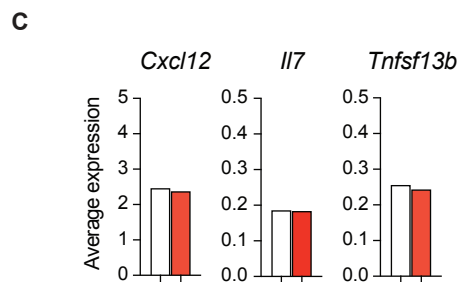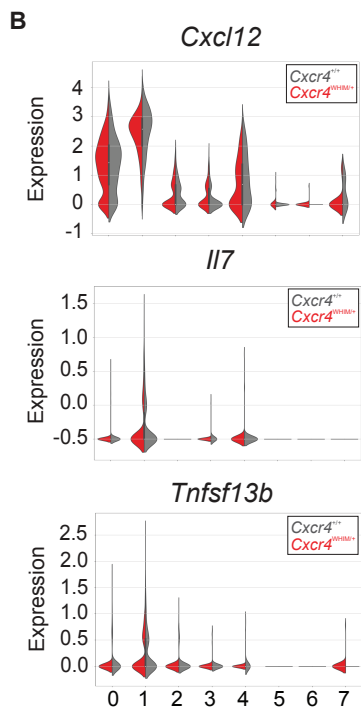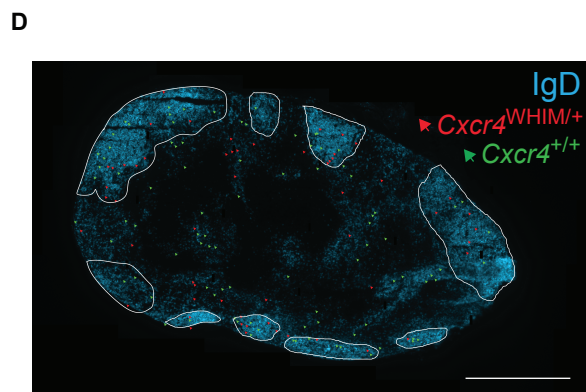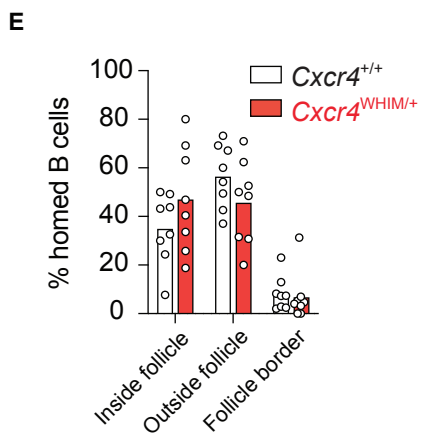

Supplement: NIHMS1838718-supplement-Sup__Fig__7.pdf [file NIHMS1838718-supplement-Sup__Fig__7.pdf]
